# Supplementary material for: Joint association of cadmium exposure and inflammatory indicators with mortality in US cancer survivors
Source: Research Square preprint supplement (doi:10.21203/rs.3.rs-7191853/v1), 2025-08-07
Supplement: Supplementary file 1 [file c4e1cb7b8074828e15092685.docx]

**Table S1 Joint association of blood cadmium and inflammatory markers with CVD-mortality among cancer survivors.**

| **Subgroups** | **Case** | **Model I** | | **Model II** | | **Model III** | |
| --- | --- | --- | --- | --- | --- | --- | --- |
| **HR (95% CI)** | **P value** | **HR (95% CI)** | **P value** | **HR (95% CI)** | **P value** |
| **Cd and PIV** |  |  |  |  |  |  |  |
| Group 1 | 581 (23.71) | 1.00 (ref) |  | 1.00 (ref) |  | 1.00 (ref) |  |
| Group 2 | 542 (22.12) | 2.10 (0.92-4.85) | 0.079 | 2.01 (0.85-4.75) | 0.114 | 1.64 (0.69-3.88) | 0.263 |
| Group 3 | 631 (25.76) | 2.07 (0.96-4.47) | 0.064 | 2.13 (0.99-4.58) | 0.052 | 2.06 (0.93-4.58) | 0.076 |
| Group 4 | 696 (28.41) | 3.51（1.70-7.27） | **0.001** | 2.97 (1.44-6.17) | **0.003** | 2.85 (1.26-6.43) | **0.012** |
| P for trend |  |  | **< 0.001** |  | **< 0.001** |  | **0.002** |
| **Cd and PLR** |  |  |  |  |  |  |  |
| Group 1 | 561 (22.90) | 1.00 (ref) |  | 1.00 (ref) |  | 1.00 (ref) |  |
| Group 2 | 562 (22.94) | 0.91 ( 0.46-1.79) | 0.788 | 0.84 (0.42-1.65) | 0.604 | 0.81 (0.42-1.57) | 0.532 |
| Group 3 | 690 (28.16) | 1.24 (0.67-2.28) | 0.496 | 1.16 (0.65-2.09) | 0.614 | 1.18 (0.63-2.23) | 0.609 |
| Group 4 | 637 (26.00) | 2.43 (1.42-4.13) | **0.001** | 2.10 (1.21-3.66) | **0.009** | 2.26 (1.20-4.25) | **0.012** |
| P for trend |  |  | **< 0.001** |  | **0.001** |  | **0.003** |
| **Cd and MLR** |  |  |  |  |  |  |  |
| Group 1 | 566 (23.10) | 1.00 (ref) |  | 1.00 (ref) |  | 1.00 (ref) |  |
| Group 2 | 557 (22.73) | 3.02 (1.32-6.89) | **0.009** | 2.44 (1.06-5.60) | **0.036** | 2.14 (0.90-5.09) | 0.084 |
| Group 3 | 653 (26.65) | 1.77 (0.97-3.21) | 0.063 | 1.78 (0.94-3.35) | 0.076 | 1.78 (0.92-3.45) | 0.086 |
| Group 4 | 674 (27.51) | 5.82(3.13-10.82) | **< 0.001** | 4.12 (2.13-7.98) | **< 0.001** | 3.99 (2.00-7.97) | **< 0.001** |
| P for trend |  |  | **< 0.001** |  | **< 0.001** |  | **< 0.001** |
| **Cd and NLR** |  |  |  |  |  |  |  |
| Group 1 | 545 (22.24) | 1.00 (ref) |  | 1.00 (ref) |  | 1.00 (ref) |  |
| Group 2 | 578 (23.59) | 2.21 (0.94-5.21) | 0.071 | 1.78 (0.76-4.19) | 0.187 | 1.52 (0.63-3.67) | 0.356 |
| Group 3 | 643 (26.24) | 1.60 (0.71-3.60) | 0.256 | 1.44 (0.65-3.18) | 0.361 | 1.46 (0.61-3.50) | 0.394 |
| Group 4 | 684 (27.92) | 4.65(2.12-10.21) | **< 0.001** | 3.62 (1.65-7.96) | **0.001** | 3.32 (1.34-8.25) | **0.01** |
| P for trend |  |  | **< 0.001** |  | **< 0.001** |  | **< 0.001** |
| **Cd and SII** |  |  |  |  |  |  |  |
| Group 1 | 555 (22.6)5 | 1.00 (ref) |  | 1.00 (ref) |  | 1.00 (ref) |  |
| Group 2 | 568 (23.19) | 1.40 (0.72-2.73) | 0.327 | 1.27 (0.64-2.52) | 0.504 | 1.06 (0.54-2.05) | 0.869 |
| Group 3 | 650 (26.53) | 1.56 (0.77-3.16) | 0.215 | 1.51 (0.76-3.01) | 0.237 | 1.46 (0.72-2.97) | 0.300 |
| Group 4 | 677 (27.63) | 2.90 (1.51-5.56) | **0.001** | 2.44 (1.27-4.70) | **0.007** | 2.37 (1.11-5.03) | **0.025** |
| P for trend |  |  | **< 0.001** |  | **< 0.001** |  | **0.007** |
| **Cd and SIRI** |  |  |  |  |  |  |  |
| Group 1 | 570 (23.27) | 1.00 (ref) |  | 1.00 (ref) |  | 1.00 (ref) |  |
| Group 2 | 553 (22.57) | 2.37 (1.03-5.49) | **0.044** | 1.94 (0.82-4.59) | 0.131 | 1.64 (0.66-4.09) | 0.288 |
| Group 3 | 617 (25.18) | 1.70 (0.80-3.61) | 0.166 | 1.70 (0.80-3.64) | 0.171 | 1.76 (0.74-4.17) | 0.200 |
| Group 4 | 710 (28.98) | 4.28 (2.10-8.72) | **< 0.001** | 3.23 (1.58-6.61) | **< 0.001** | 3.04 (1.32-7.02) | **0.009** |
| P for trend |  |  | **< 0.001** |  | **< 0.001** |  | **< 0.001** |

Model I: non-adjusted; Model II: adjusted for age, gender, race,PIR,education level, marital status; Model III: further adjusted for BMI,sleep disorder,smoking status, alcohol status, Hypertension, Diabetes.Group 1 refers to Low blood cadmium levels & CBC-derived inflammatory biomarkers  ≤  median; Group 2 refers to Low blood cadmium levels & CBC-derived inflammatory biomarkers  ≥  median; Group 3 refers to High blood cadmium levels & CBC-derived inflammatory biomarkers  ≤ median; Group 4 refers to High blood cadmium levels & CBC-derived inflammatory biomarkers  ≥  median.

PIV: platelet-immune inflammation value; NLR:neutrophil-to-lymphocyte ratio; MLR:monocyte-to-lymphocyte ratio;PLR:platelet-to-lymphocyte ratio;SII:systemic immune-inflammation index;SIRI:systemic inflammation response index;Cd:blood cadmium

**Table S2 Joint association of blood cadmium and inflammatory markers with cancer-specific mortality among cancer survivors.**

| **Subgroups** | **Case** | **Model I** | | **Model II** | | **Model III** | |
| --- | --- | --- | --- | --- | --- | --- | --- |
| **HR (95% CI)** | **P value** | **HR (95% CI)** | **P value** | **HR (95% CI)** | **P value** |
| **Cd and PIV** |  |  |  |  |  |  |  |
| Group 1 | 581 (23.71) | 1.00 (ref) |  | 1.00 (ref) |  | 1.00 (ref) |  |
| Group 2 | 542 (22.12) | 0.87 (0.50-1.53) | 0.627 | 0.84 (0.47-1.51) | 0.562 | 0.78 (0.42-1.41) | 0.405 |
| Group 3 | 631 (25.76) | 1.07 (0.61-1.87) | 0.823 | 1.10 (0.62-1.95) | 0.747 | 0.60 (1.14-1.88) | 0.835 |
| Group 4 | 696 (28.41) | 1.38 (0.83-2.31) | 0.218 | 1.24 (0.72-2.13) | 0.434 | 1.15 (0.69-1.93) | 0.593 |
| P for trend |  |  | 0.155 |  | 0.304 |  | 0.408 |
| **Cd and PLR** |  |  |  |  |  |  |  |
| Group 1 | 561 (22.90) | 1.00 (ref) |  | 1.00 (ref) |  | 1.00 (ref) |  |
| Group 2 | 562 (22.94) | 1.22 (0.71-2.09) | 0.479 | 1.18 (0.70-1.99) | 0.530 | 1.15 (0.66-1.99) | 0.626 |
| Group 3 | 690 (28.16) | 1.28 (0.73-2.24) | 0.397 | 1.25 (0.71-2.21) | 0.443 | 1.20 (0.70-2.07) | 0.517 |
| Group 4 | 637 (26.00) | 1.67 (0.99-2.82) | 0.056 | 1.55 (0.91-2.65) | 0.106 | 1.50 (0.85-2.65) | 0.161 |
| P for trend |  |  | 0.052 |  | 0.103 |  | 0.141 |
| **Cd and MLR** |  |  |  |  |  |  |  |
| Group 1 | 566 (23.10) | 1.00 (ref) |  | 1.00 (ref) |  | 1.00 (ref) |  |
| Group 2 | 557 (22.73) | 1.91 (1.04-3.53) | **0.038** | 1.62 (0.87-3.01) | 0.127 | 1.59 (0.84-3.03) | 0.157 |
| Group 3 | 653 (26.65) | 0.97 (0.53-1.77) | 0.915 | 0.98 (0.53-1.81) | 0.938 | 0.95 (0.53-1.72) | 0.865 |
| Group 4 | 674 (27.51) | 2.93 (3.02-5.14) | **< 0.001** | 2.29 (1.27-4.12) | **0.006** | 2.19 (1.19-4.04) | **0.012** |
| P for trend |  |  | **0.001** |  | **0.012** |  | **0.015** |
| **Cd and NLR** |  |  |  |  |  |  |  |
| Group 1 | 545 (22.24) | 1.00 (ref) |  | 1.00 (ref) |  | 1.00 (ref) |  |
| Group 2 | 578 (23.59) | 1.30 (0.69-2.44) | 0.421 | 1.09 (0.59-2.01) | 0.789 | 1.01 (0.54-1.89) | 0.987 |
| Group 3 | 643 (26.24) | 1.24 (0.70-2.18) | 0.467 | 1.15 (0.65-2.02) | 0.630 | 1.10 (0.64-1.89) | 0.730 |
| Group 4 | 684 (27.92) | 1.81 (1.08-3.03) | **0.024** | 1.52 (0.90-2.56) | 0.117 | 1.40 (0.81-2.41) | 0.232 |
| P for trend |  |  | **0.027** |  | 0.107 |  | 0.159 |
| **Cd and SII** |  |  |  |  |  |  |  |
| Group 1 | 555 (22.6)5 | 1.00 (ref) |  | 1.00 (ref) |  | 1.00 (ref) |  |
| Group 2 | 568 (23.19) | 0.78 (0.46-1.35) | 0.374 | 0.74 (0.43-1.30) | 0.563 | 0.69 (0.39-1.23) | 0.204 |
| Group 3 | 650 (26.53) | 1.12 (0.65-1.96) | 0.680 | 1.11 (0.62-1.96) | 0.053 | 1.06 (0.61-1.83) | 0.850 |
| Group 4 | 677 (27.63) | 1.21 (0.71-2.04) | 0.483 | 1.11 (0.64-1.91) | **< 0.001** | 1.03 (0.61-1.74) | 0.923 |
| P for trend |  |  | 0.283 |  | 0.451 |  | 0.597 |
| **Cd and SIRI** |  |  |  |  |  |  |  |
| Group 1 | 570 (23.27) | 1.00 (ref) |  | 1.00 (ref) |  | 1.00 (ref) |  |
| Group 2 | 553 (22.57) | 1.30 (0.71-2.38) | 0.389 | 1.12 (0.61-2.08) | 0.716 | 1.04 (0.55-1.98) | 0.901 |
| Group 3 | 617 (25.18) | 1.05 (0.64-1.74) | 0.845 | 1.07 (0.64-1.76) | 0.807 | 1.04 (0.62-1.74) | 0.877 |
| Group 4 | 710 (28.98) | 1.91 (1.13-3.25) | **0.016** | 1.57 (0.90-2.75) | 0.113 | 1.46 (0.82-2.60) | 0.198 |
| P for trend |  |  | **0.027** |  | 0.114 |  | 0.165 |

Model I: non-adjusted; Model II: adjusted for age, gender, race,PIR,education level, marital status; Model III: further adjusted for BMI,sleep disorder,smoking status, alcohol status, Hypertension, Diabetes.

Group 1 refers to Low blood cadmium levels & CBC-derived inflammatory biomarkers  ≤  median; Group 2 refers to Low blood cadmium levels & CBC-derived inflammatory biomarkers  ≥  median; Group 3 refers to High blood cadmium levels & CBC-derived inflammatory biomarkers  ≤ median; Group 4 refers to High blood cadmium levels & CBC-derived inflammatory biomarkers  ≥  median.

PIV:platelet-immune inflammation value; NLR:neutrophil-to-lymphocyte ratio; MLR:monocyte-to-lymphocyte ratio;PLR:platelet-to-lymphocyte ratio;SII:systemic immune-inflammation index;SIRI:systemic inflammation response index;Cd:blood cadmium

Table S3 Association of inflammatory markers and blood cadmium markers with all-cause among cancer survivors.

| **Subgroups** | **Case** | **Model I** | | **Model II** | | **Model III** | |
| --- | --- | --- | --- | --- | --- | --- | --- |
| **HR (95% CI)** | **P value** | **HR (95% CI)** | **P value** | **HR (95% CI)** | **P value** |
| **PIV** |  |  |  |  |  |  |  |
| Low | 1212 (49.5) | 1.00 (ref) |  | 1.00 (ref) |  | 1.00 (ref) |  |
| High | 1238 (50.5) | 1.50 (1.22-1.85) | **< 0.001** | 1.36 (1.11-1.65) | **0.003** | 1.24 (1.03-1.49) | **0.024** |
| **PLR** |  |  |  |  |  |  |  |
| Low | 1251 (51.1) | 1.00 (ref) |  | 1.00 (ref) |  | 1.00 (ref) |  |
| High | 1199 (48.9) | 1.30 ( 1.03-1.64) | **0.027** | 1.22 (0.97-1.53) | 0.088 | 1.18 (0.93-1.50) | 0.175 |
| **MLR** |  |  |  |  |  |  |  |
| Low | 1219 (49.8) | 1.00 (ref) |  | 1.00 (ref) |  | 1.00 (ref) |  |
| High | 1231 (50.2) | 2.60 (2.07-3.27) | **< 0.001** | 2.08 (1.66-2.61) | **< 0.001** | 1.97 (1.58-2.47) | **< 0.001** |
| **NLR** |  |  |  |  |  |  |  |
| Low | 1188 (48.5) | 1.00 (ref) |  | 1.00 (ref) |  | 1.00 (ref) |  |
| High | 1262 (51.5) | 1.81 (1.46-2.27) | **< 0.001** | 1.60 (1.27-2.00) | **< 0.001** | 1.45 (1.16-1.83) | **0.001** |
| **SII** |  |  |  |  |  |  |  |
| Low | 1205 (49.2) | 1.00 (ref) |  | 1.00 (ref) |  | 1.00 (ref) |  |
| High | 1245 (50.8) | 1.35 (1.10-1.66) | **0.004** | 1.24 (1.00-1.55) | **0.049** | 1.15 (0.93-1.42) | 0.200 |
| **SIRI** |  |  |  |  |  |  |  |
| Low | 1187 (48.4) | 1.00 (ref) |  | 1.00 (ref) |  | 1.00 (ref) |  |
| High | 1263 (51.6) | 2.19 (1.74-2.75) | **< 0.001** | 1.83 (1.46-2.29) | **< 0.001** | 1.65 (1.33-2.06) | **< 0.001** |
| **Cr** |  |  |  |  |  |  |  |
| Low | 1123 (45.8) | 1.00 (ref) |  | 1.00 (ref) |  | 1.00 (ref) |  |
| High | 1327 (54.2) | 1.68 (1.39-2.02) | **< 0.001** | 1.55 (1.26-1.89) | **< 0.001** | 1.54 (1.26-1.89) | **< 0.001** |

Model I: non-adjusted; Model II: adjusted for age, gender, race,PIR,education level, marital status; Model III: further adjusted for BMI,sleep disorder,smoking status, alcohol status, Hypertension, Diabetes.

Low: blood cadmium levels or CBC-derived inflammatory biomarkers  ≤  median;

High: blood cadmium levels or CBC-derived inflammatory biomarkers  ≥ median;

PIV:platelet-immune inflammation value; NLR:neutrophil-to-lymphocyte ratio; MLR:monocyte-to-lymphocyte ratio;PLR:platelet-to-lymphocyte ratio;SII:systemic immune-inflammation index;SIRI:systemic inflammation response index;Cd:blood cadmium

**Table S4 Subgroup Analysis of Joint Associations of Blood Cadmium and PIV with Mortality in Cancer Survivors.**

| Cd AND PIV | Count | Percent | Levels | HR (95%CI) | P for interaction |
| --- | --- | --- | --- | --- | --- |
| **Education level** |  |  |  |  | 0.066 |
| Less than high school | 1092 | 44.57 | Group1 | Reference |  |
|  |  |  | Group2 | 1.05 (0.67,1.66) |  |
|  |  |  | Group3 | 2.12 (1.32,3.39) |  |
|  |  |  | Group4 | 2.41 (1.44,4.04) |  |
| High school or equivalent | 725 | 29.59 | Group1 | Reference |  |
|  |  |  | Group2 | 0.89 (0.47,1.68) |  |
|  |  |  | Group3 | 1.46 (0.82,2.60) |  |
|  |  |  | Group4 | 1.37 (0.69,2.73) |  |
| College or above | 633 | 25.84 | Group1 | Reference |  |
|  |  |  | Group2 | 1.86 (0.87,4.00) |  |
|  |  |  | Group3 | 1.27 (0.57,2.86) |  |
|  |  |  | Group4 | 3.69 (1.80,7.56) |  |
| PIR |  |  |  |  | 0.756 |
| ＜3.5 | 1606 | 65.55 | Group1 | Reference |  |
|  |  |  | Group2 | 1.23 (0.87,1.72) |  |
|  |  |  | Group3 | 1.76 (1.23,2.52) |  |
|  |  |  | Group4 | 2.05 (1.48,2.85) |  |
| ≥3.5 | 844 | 34.45 | Group1 | Reference |  |
|  |  |  | Group2 | 1.29 (0.67,2.51) |  |
|  |  |  | Group3 | 1.20 (0.63,2.32) |  |
|  |  |  | Group4 | 1.88 (1.01,3.50) |  |
| Race |  |  |  |  | 0.099 |
| Mexican American | 175 | 7.14 | Group1 | Reference |  |
|  |  |  | Group2 | 0.54 (0.05,5.31) |  |
|  |  |  | Group3 | 1.95 (0.44,8.55) |  |
|  |  |  | Group4 | 2.02 (0.47,8.59) |  |
| Other Hispanic | 147 | 6.00 | Group1 | Reference |  |
|  |  |  | Group2 | 0.67 (0.21,2.09) |  |
|  |  |  | Group3 | 1.09 (0.11,11.31) |  |
|  |  |  | Group4 | 0.80 (0.20,3.22) |  |
| Non-Hispanic White | 1645 | 67.14 | Group1 | Reference |  |
|  |  |  | Group2 | 1.12 (0.80,1.57) |  |
|  |  |  | Group3 | 1.50 (1.08,2.10) |  |
|  |  |  | Group4 | 1.94 (1.42,2.64) |  |
| Non-Hispanic Black | 670 | 27.35 | Group1 | Reference |  |
|  |  |  | Group2 | 2.02 (0.85,4.80) |  |
|  |  |  | Group3 | 2.41 (1.02,5.69) |  |
|  |  |  | Group4 | 3.15 (1.30,7.66) |  |
| Other Race | 138 | 5.63 | Group1 | Reference |  |
|  |  |  | Group2 | 3.63 (0.51,25.93) |  |
|  |  |  | Group3 | 0.20 (0.00,34.65) |  |
|  |  |  | Group4 | 12.88 (0.43,389.76) |  |
| **Marital status, n (%)** |  |  |  |  | 0.861 |
| Married/Living with partner | 1395 | 56.94 | Group1 | Reference |  |
|  |  |  | Group2 | 1.15 (0.71,1.86) |  |
|  |  |  | Group3 | 1.22 (0.76,1.95) |  |
|  |  |  | Group4 | 1.84 (1.15,2.96) |  |
| Widowed / Divorced / Separated | 1055 | 43.06 |  |  |  |
|  |  |  | Group1 | Reference |  |
|  |  |  | Group2 | 1.34 (0.83,2.16) |  |
|  |  |  | Group3 | 2.16 (1.37,3.41) |  |
|  |  |  | Group4 | 2.11 (1.40,3.20) |  |

PIR, poverty income ratio; PIR, poverty income ratio; Cd:blood cadmium;P-value of <0.05 was considered statistically significant.

**Table S5 Subgroup Analysis of Joint Associations of Blood Cadmium and PLR with Mortality in Cancer Survivors.**

| Cd AND PLR | Count | Percent | Levels | HR (95%CI) | P for interaction |
| --- | --- | --- | --- | --- | --- |
| **Education level** |  |  |  |  | 0.378 |
| Less than high school | 1092 | 44.57 | Group1 | Reference |  |
|  |  |  | Group2 | 0.81 (0.48,1.37) |  |
|  |  |  | Group3 | 1.34 (0.93,1.92) |  |
|  |  |  | Group4 | 1.78 (1.14,2.79) |  |
| High school or equivalent | 725 | 29.59 | Group1 | Reference |  |
|  |  |  | Group2 | 0.65 (0.34,1.25) |  |
|  |  |  | Group3 | 1.08 (0.60,1.95) |  |
|  |  |  | Group4 | 1.37 (0.70,2.69) |  |
| College or above | 633 | 25.84 | Group1 | Reference |  |
|  |  |  | Group2 | 1.44 (0.66,3.14) |  |
|  |  |  | Group3 | 1.52 (0.71,3.25) |  |
|  |  |  | Group4 | 2.94 (1.35,6.41) |  |
| PIR |  |  |  |  | 0.796 |
| ＜3.5 | 1606 | 65.55 | Group1 | Reference |  |
|  |  |  | Group2 | 0.89 (0.60,1.33) |  |
|  |  |  | Group3 | 1.43 (0.99,2.06) |  |
|  |  |  | Group4 | 1.84 (1.27,2.66) |  |
| ≥3.5 | 844 | 34.45 | Group1 | Reference |  |
|  |  |  | Group2 | 0.86 (0.43,1.70) |  |
|  |  |  | Group3 | 0.78 (0.43,1.43) |  |
|  |  |  | Group4 | 1.76 (0.90,3.45) |  |
| Race |  |  |  |  | 0.190 |
| Mexican American | 175 | 7.14 | Group1 | Reference |  |
|  |  |  | Group2 | 0.08 (0.01,0.57) |  |
|  |  |  | Group3 | 0.83 (0.16,4.32) |  |
|  |  |  | Group4 | 2.10 (0.49,9.05) |  |
| Other Hispanic | 147 | 6.00 | Group1 | Reference |  |
|  |  |  | Group2 | 1.90 (0.80,4.5) |  |
|  |  |  | Group3 | 1.72 (0.13,22.32) |  |
|  |  |  | Group4 | 2.13 (0.46,9.77) |  |
| Non-Hispanic White | 1645 | 67.14 | Group1 | Reference |  |
|  |  |  | Group2 | 0.88 (0.58,1.34) |  |
|  |  |  | Group3 | 1.25 (0.88,1.79) |  |
|  |  |  | Group4 | 1.82 (1.23,2.69) |  |
| Non-Hispanic Black | 670 | 27.35 | Group1 | Reference |  |
|  |  |  | Group2 | 0.68 (0.26,1.78) |  |
|  |  |  | Group3 | 1.16 (0.57,2.33) |  |
|  |  |  | Group4 | 2.28 (1.20,4.32) |  |
| Other Race | 138 | 5.63 | Group1 | Reference |  |
|  |  |  | Group2 | 2.57 (0.26,25.34) |  |
|  |  |  | Group3 | 2.11 (0.07,63.40) |  |
|  |  |  | Group4 | 6.40 (0.26,154.92) |  |
| **Marital status, n (%)** |  |  |  |  | 0.273 |
| Married/Living with partner | 1395 | 56.94 | Group1 | Reference |  |
|  |  |  | Group2 | 0.85 (0.52,1.39) |  |
|  |  |  | Group3 | 1.11 (0.69,1.75) |  |
|  |  |  | Group4 | 1.59 (0.95,2.65) |  |
| Widowed / Divorced / Separated | 1055 | 43.06 |  |  |  |
|  |  |  | Group1 | Reference |  |
|  |  |  | Group2 | 0.98 (0.64,1.48) |  |
|  |  |  | Group3 | 1.50 (1.01,2.23) |  |
|  |  |  | Group4 | 2.11 (1.49,2.99) |  |

PIR, poverty income ratio; PLR:platelet-to-lymphocyte ratio;Cd:blood cadmium;P-value of <0.05 was considered statistically significant.

**Table S6 Subgroup Analysis of Joint Associations of Blood Cadmium and MLR with Mortality in Cancer Survivors.**

| Cd AND MLR | Count | Percent | Levels | HR (95%CI) | P for interaction |
| --- | --- | --- | --- | --- | --- |
| **Education level** |  |  |  |  | 0.696 |
| Less than high school | 1092 | 44.57 | Group1 | Reference |  |
|  |  |  | Group2 | 1.75 (0.87,3.51) |  |
|  |  |  | Group3 | 1.79 (1.03,3.10) |  |
|  |  |  | Group4 | 2.93 (1.57,5.47) |  |
| High school or equivalent | 725 | 29.59 | Group1 | Reference |  |
|  |  |  | Group2 | 3.23 (1.69,6.15) |  |
|  |  |  | Group3 | 2.04 (1.02,4.09) |  |
|  |  |  | Group4 | 4.36 (2.09,9.11) |  |
| College or above | 633 | 25.84 | Group1 | Reference |  |
|  |  |  | Group2 | 1.66 (0.76,3.63) |  |
|  |  |  | Group3 | 1.08 (0.44,2.64) |  |
|  |  |  | Group4 | 3.31 (1.56,7.02) |  |
| PIR |  |  |  |  | 0.919 |
| ＜3.5 | 1606 | 65.55 | Group1 | Reference |  |
|  |  |  | Group2 | 2.30 (1.42,3.73) |  |
|  |  |  | Group3 | 2.12 (1.40,3.23) |  |
|  |  |  | Group4 | 3.37 (2.14,5.31) |  |
| ≥3.5 | 844 | 34.45 | Group1 | Reference |  |
|  |  |  | Group2 | 1.87 (0.93,3.78) |  |
|  |  |  | Group3 | 0.99 (0.45,2.19) |  |
|  |  |  | Group4 | 2.97 (1.48,5.95) |  |
| Race |  |  |  |  | 0.586 |
| Mexican American | 175 | 7.14 | Group1 | Reference |  |
|  |  |  | Group2 | 0.00 (0.00,0.00) |  |
|  |  |  | Group3 | 0.99 (0.20,4.90) |  |
|  |  |  | Group4 | 3.18 (0.68,14.97) |  |
| Other Hispanic | 147 | 6.00 | Group1 | Reference |  |
|  |  |  | Group2 | 6.01 (1.14,31.61) |  |
|  |  |  | Group3 | 3.49 (0.88,13.75) |  |
|  |  |  | Group4 | 4.11 (0.59,28.77) |  |
| Non-Hispanic White | 1645 | 67.14 | Group1 | Reference |  |
|  |  |  | Group2 | 2.19 (1.37,3.53) |  |
|  |  |  | Group3 | 1.76 (1.18,2.64) |  |
|  |  |  | Group4 | 3.44 (2.18,5.43) |  |
| Non-Hispanic Black | 670 | 27.35 | Group1 | Reference |  |
|  |  |  | Group2 | 2.35 (0.81,6.88) |  |
|  |  |  | Group3 | 2.45 (0.99,6.10) |  |
|  |  |  | Group4 | 3.12 (1.43,6.83) |  |
| Other Race | 138 | 5.63 | Group1 | Reference |  |
|  |  |  | Group2 | 2.47 (0.26,23.91) |  |
|  |  |  | Group3 | 0.31 (0.00,26.88) |  |
|  |  |  | Group4 | 3.96 (0.32,48.97) |  |
| **Marital status, n (%)** |  |  |  |  | 0.884 |
| Married/Living with partner | 1395 | 56.94 | Group1 | Reference |  |
|  |  |  | Group2 | 2.14 (1.26,3.63) |  |
|  |  |  | Group3 | 1.42 (0.89,2.27) |  |
|  |  |  | Group4 | 3.09 (1.85,5.18) |  |
| Widowed / Divorced / Separated | 1055 | 43.06 |  |  |  |
|  |  |  | Group1 | Reference |  |
|  |  |  | Group2 | 2.25 (1.38,3.66) |  |
|  |  |  | Group3 | 2.22 (1.41,3.49) |  |
|  |  |  | Group4 | 3.48 (2.22,5.45) |  |

PIR, poverty income ratio;MLR:monocyte-to-lymphocyte ratio;Cd:blood cadmium;P-value of <0.05 was considered statistically significant.

**Table S7 Subgroup Analysis of Joint Associations of Blood Cadmium and NLR with Mortality in Cancer Survivors.**

| Cd AND NLR | Count | Percent | Levels | HR (95%CI) | P for interaction |
| --- | --- | --- | --- | --- | --- |
| **Education level** |  |  |  |  | 0.911 |
| Less than high school | 1092 | 44.57 | Group1 | Reference |  |
|  |  |  | Group2 | 1.65 (1.03,2.63) |  |
|  |  |  | Group3 | 1.79 (1.12,2.86) |  |
|  |  |  | Group4 | 2.80 (1.71,4.59) |  |
| High school or equivalent | 725 | 29.59 | Group1 | Reference |  |
|  |  |  | Group2 | 1.05 (0.49,2.27) |  |
|  |  |  | Group3 | 1.31 (0.65,2.64) |  |
|  |  |  | Group4 | 1.88 (0.81,4.35) |  |
| College or above | 633 | 25.84 | Group1 | Reference |  |
|  |  |  | Group2 | 1.27 (0.58,2.80) |  |
|  |  |  | Group3 | 1.07 (0.44,2.58) |  |
|  |  |  | Group4 | 2.74 (1.26,5.96) |  |
| PIR |  |  |  |  | 0.949 |
| ＜3.5 | 1606 | 65.55 | Group1 | Reference |  |
|  |  |  | Group2 | 1.33 (0.80,2.22) |  |
|  |  |  | Group3 | 1.58 (0.96,2.60) |  |
|  |  |  | Group4 | 2.43 (1.54,3.82) |  |
| ≥3.5 | 844 | 34.45 | Group1 | Reference |  |
|  |  |  | Group2 | 1.37 (0.66,2.83) |  |
|  |  |  | Group3 | 1.15 (0.54,2.46) |  |
|  |  |  | Group4 | 2.16 (1.06,4.40) |  |
| Race |  |  |  |  | 0.145 |
| Mexican American | 175 | 7.14 | Group1 | Reference |  |
|  |  |  | Group2 | 0.42 (0.03,5.95) |  |
|  |  |  | Group3 | 1.78 (0.37,8.58) |  |
|  |  |  | Group4 | 1.30 (0.18,9.25) |  |
| Other Hispanic | 147 | 6.00 | Group1 | Reference |  |
|  |  |  | Group2 | 1.49 (0.41,5.37) |  |
|  |  |  | Group3 | 1.45 (0.16,12.77) |  |
|  |  |  | Group4 | 1.34 (0.20,9.07) |  |
| Non-Hispanic White | 1645 | 67.14 | Group1 | Reference |  |
|  |  |  | Group2 | 1.21 (0.73,2.00) |  |
|  |  |  | Group3 | 1.34 (0.84,2.15) |  |
|  |  |  | Group4 | 2.32 (1.47,3.67) |  |
| Non-Hispanic Black | 670 | 27.35 | Group1 | Reference |  |
|  |  |  | Group2 | 1.52 (0.62,3.76) |  |
|  |  |  | Group3 | 2.03 (0.87,4.73) |  |
|  |  |  | Group4 | 2.98 (1.26,7.05) |  |
| Other Race | 138 | 5.63 | Group1 | Reference |  |
|  |  |  | Group2 | 4.53 (0.31,65.81) |  |
|  |  |  | Group3 | 0.00 (0.00,0.00) |  |
|  |  |  | Group4 | 14.64 (0.11,1874.2) |  |
| **Marital status, n (%)** |  |  |  |  | 0.923 |
| Married/Living with partner | 1395 | 56.94 | Group1 | Reference |  |
|  |  |  | Group2 | 1.20 (0.69,2.08) |  |
|  |  |  | Group3 | 1.09 (0.60,1.98) |  |
|  |  |  | Group4 | 2.10 (1.18,3.74) |  |
| Widowed / Divorced / Separated | 1055 | 43.06 |  |  |  |
|  |  |  | Group1 | Reference |  |
|  |  |  | Group2 | 1.22 (0.75,2.00) |  |
|  |  |  | Group3 | 1.73 (1.10,2.71) |  |
|  |  |  | Group4 | 2.39 (1.50,3.79) |  |

PIR, poverty income ratio;NLR:neutrophil-to-lymphocyte ratio;Cd:blood cadmium;P-value of <0.05 was considered statistically significant.

**Table S8 Subgroup Analysis of Joint Associations of Blood Cadmium and SII with Mortality in Cancer Survivors.**

| Cd AND SII | Count | Percent | Levels | HR (95%CI) | P for interaction |
| --- | --- | --- | --- | --- | --- |
| **Education level** |  |  |  |  | 0.201 |
| Less than high school | 1092 | 44.57 | Group1 | Reference |  |
|  |  |  | Group2 | 0.97 (0.58,1.64) |  |
|  |  |  | Group3 | 1.57 (0.98,2.52) |  |
|  |  |  | Group4 | 1.84 (1.21,2.81) |  |
| High school or equivalent | 725 | 29.59 | Group1 | Reference |  |
|  |  |  | Group2 | 0.64 (0.32,1.27) |  |
|  |  |  | Group3 | 1.06 (0.58,1.95) |  |
|  |  |  | Group4 | 1.38 (0.64,2.97) |  |
| College or above | 633 | 25.84 | Group1 | Reference |  |
|  |  |  | Group2 | 1.72 (0.76,3.87) |  |
|  |  |  | Group3 | 1.46 (0.66,3.23) |  |
|  |  |  | Group4 | 3.20 (1.49,6.90) |  |
| PIR |  |  |  |  | 0.699 |
| ＜3.5 | 1606 | 65.55 | Group1 | Reference |  |
|  |  |  | Group2 | 0.96 (0.68,1.35) |  |
|  |  |  | Group3 | 1.54 (1.02,2.32) |  |
|  |  |  | Group4 | 1.83 (1.31,2.56) |  |
| ≥3.5 | 844 | 34.45 | Group1 | Reference |  |
|  |  |  | Group2 | 1.08 (0.54,2.16) |  |
|  |  |  | Group3 | 0.97 (0.50,1.89) |  |
|  |  |  | Group4 | 1.84 (0.96,3.54) |  |
| Race |  |  |  |  | 0.076 |
| Mexican American | 175 | 7.14 | Group1 | Reference |  |
|  |  |  | Group2 | 0.32 (0.05,2.09) |  |
|  |  |  | Group3 | 1.82 (0.44,7.59) |  |
|  |  |  | Group4 | 1.14 (0.26,5.02) |  |
| Other Hispanic | 147 | 6.00 | Group1 | Reference |  |
|  |  |  | Group2 | 0.67 (0.2,2.24) |  |
|  |  |  | Group3 | 0.70 (0.05,10.36) |  |
|  |  |  | Group4 | 1.21 (0.32,4.65) |  |
| Non-Hispanic White | 1645 | 67.14 | Group1 | Reference |  |
|  |  |  | Group2 | 0.95 (0.65,1.39) |  |
|  |  |  | Group3 | 1.35 (0.93,1.96) |  |
|  |  |  | Group4 | 1.81 (1.27,2.59) |  |
| Non-Hispanic Black | 670 | 27.35 | Group1 | Reference |  |
|  |  |  | Group2 | 0.84 (0.30,2.35) |  |
|  |  |  | Group3 | 1.38 (0.64,2.96) |  |
|  |  |  | Group4 | 2.70 (1.19,6.15) |  |
| Other Race | 138 | 5.63 | Group1 | Reference |  |
|  |  |  | Group2 | 3.07 (0.13,70.28) |  |
|  |  |  | Group3 | 1.46 (0.00,1306.86) |  |
|  |  |  | Group4 | 11.85 (0.09,1549.81) |  |
| **Marital status, n (%)** |  |  |  |  | 0.526 |
| Married/Living with partner | 1395 | 56.94 | Group1 | Reference |  |
|  |  |  | Group2 | 0.93 (0.58,1.48) |  |
|  |  |  | Group3 | 1.18 (0.71,1.98) |  |
|  |  |  | Group4 | 1.57 (0.95,2.58) |  |
| Widowed / Divorced / Separated | 1055 | 43.06 |  |  |  |
|  |  |  | Group1 | Reference |  |
|  |  |  | Group2 | 1.02 (0.61,1.73) |  |
|  |  |  | Group3 | 1.62 (1.00,2.64) |  |
|  |  |  | Group4 | 2.07 (1.35,3.17) |  |

PIR, poverty income ratio;SII:systemic immune-inflammation index;Cd:blood cadmium;P-value of <0.05 was considered statistically significant.

**Table S9 Subgroup Analysis of Joint Associations of Blood Cadmium and SIRI with Mortality in Cancer Survivors.**

| Cd AND SIRI | Count | Percent | Levels | HR (95%CI) | P for interaction |
| --- | --- | --- | --- | --- | --- |
| **Education level** |  |  |  |  | 0.282 |
| Less than high school | 1092 | 44.57 | Group1 | Reference |  |
|  |  |  | Group2 | 2.03 (1.17,3.5) |  |
|  |  |  | Group3 | 2.10 (1.29,3.41) |  |
|  |  |  | Group4 | 2.77 (1.71,4.50) |  |
| High school or equivalent | 725 | 29.59 | Group1 | Reference |  |
|  |  |  | Group2 | 1.22 (0.63,2.34) |  |
|  |  |  | Group3 | 1.35 (0.76,2.39) |  |
|  |  |  | Group4 | 2.11 (1.00,4.46) |  |
| College or above | 633 | 25.84 | Group1 | Reference |  |
|  |  |  | Group2 | 1.79 (0.78,4.11) |  |
|  |  |  | Group3 | 0.71 (0.28,1.80) |  |
|  |  |  | Group4 | 4.06 (1.87,8.79) |  |
| PIR |  |  |  |  | 0.741 |
| ＜3.5 | 1606 | 65.55 | Group1 | Reference |  |
|  |  |  | Group2 | 1.83 (1.11,3.02) |  |
|  |  |  | Group3 | 2.01 (1.31,3.08) |  |
|  |  |  | Group4 | 2.69 (1.74,4.17) |  |
| ≥3.5 | 844 | 34.45 | Group1 | Reference |  |
|  |  |  | Group2 | 1.51 (0.73,3.11) |  |
|  |  |  | Group3 | 0.91 (0.41,2.00) |  |
|  |  |  | Group4 | 2.48 (1.26,4.87) |  |
| Race |  |  |  |  | 0.098 |
| Mexican American | 175 | 7.14 | Group1 | Reference |  |
|  |  |  | Group2 | 0.15 (0.02,1.37) |  |
|  |  |  | Group3 | 1.18 (0.24,5.81) |  |
|  |  |  | Group4 | 0.80 (0.13,5.05) |  |
| Other Hispanic | 147 | 6.00 | Group1 | Reference |  |
|  |  |  | Group2 | 3.11 (1.17,8.25) |  |
|  |  |  | Group3 | 2.55 (0.27,24.13) |  |
|  |  |  | Group4 | 1.60 (0.28,9.27) |  |
| Non-Hispanic White | 1645 | 67.14 | Group1 | Reference |  |
|  |  |  | Group2 | 1.56 (0.99,2.45) |  |
|  |  |  | Group3 | 1.52 (1.06,2.17) |  |
|  |  |  | Group4 | 2.60 (1.75,3.86) |  |
| Non-Hispanic Black | 670 | 27.35 | Group1 | Reference |  |
|  |  |  | Group2 | 2.23 (0.78,6.36) |  |
|  |  |  | Group3 | 2.21 (0.91,5.37) |  |
|  |  |  | Group4 | 4.13 (1.66,10.26) |  |
| Other Race | 138 | 5.63 | Group1 | Reference |  |
|  |  |  | Group2 | 3.63 (0.33,40.02) |  |
|  |  |  | Group3 | 0.00 (0.00,0.00) |  |
|  |  |  | Group4 | 8.52 (0.16,465.09) |  |
| **Marital status, n (%)** |  |  |  |  | 0.483 |
| Married/Living with partner | 1395 | 56.94 | Group1 | Reference |  |
|  |  |  | Group2 | 1.35 (0.78,2.33) |  |
|  |  |  | Group3 | 1.19 (0.73,1.93) |  |
|  |  |  | Group4 | 2.16 (1.32,3.53) |  |
| Widowed / Divorced / Separated | 1055 | 43.06 |  |  |  |
|  |  |  | Group1 | Reference |  |
|  |  |  | Group2 | 1.87 (1.19,2.94) |  |
|  |  |  | Group3 | 2.13 (1.37,3.30) |  |
|  |  |  | Group4 | 2.99 (1.98,4.53) |  |

PIR, poverty income ratio;SIRI:systemic inflammation response index;Cd:blood cadmium;P-value of <0.05 was considered statistically significant.

**Figure S1 Weighted K-M curve of cancer-specific** **mortality in cancer survivors based on blood cadmium levels combined with inflammatory indicators.**


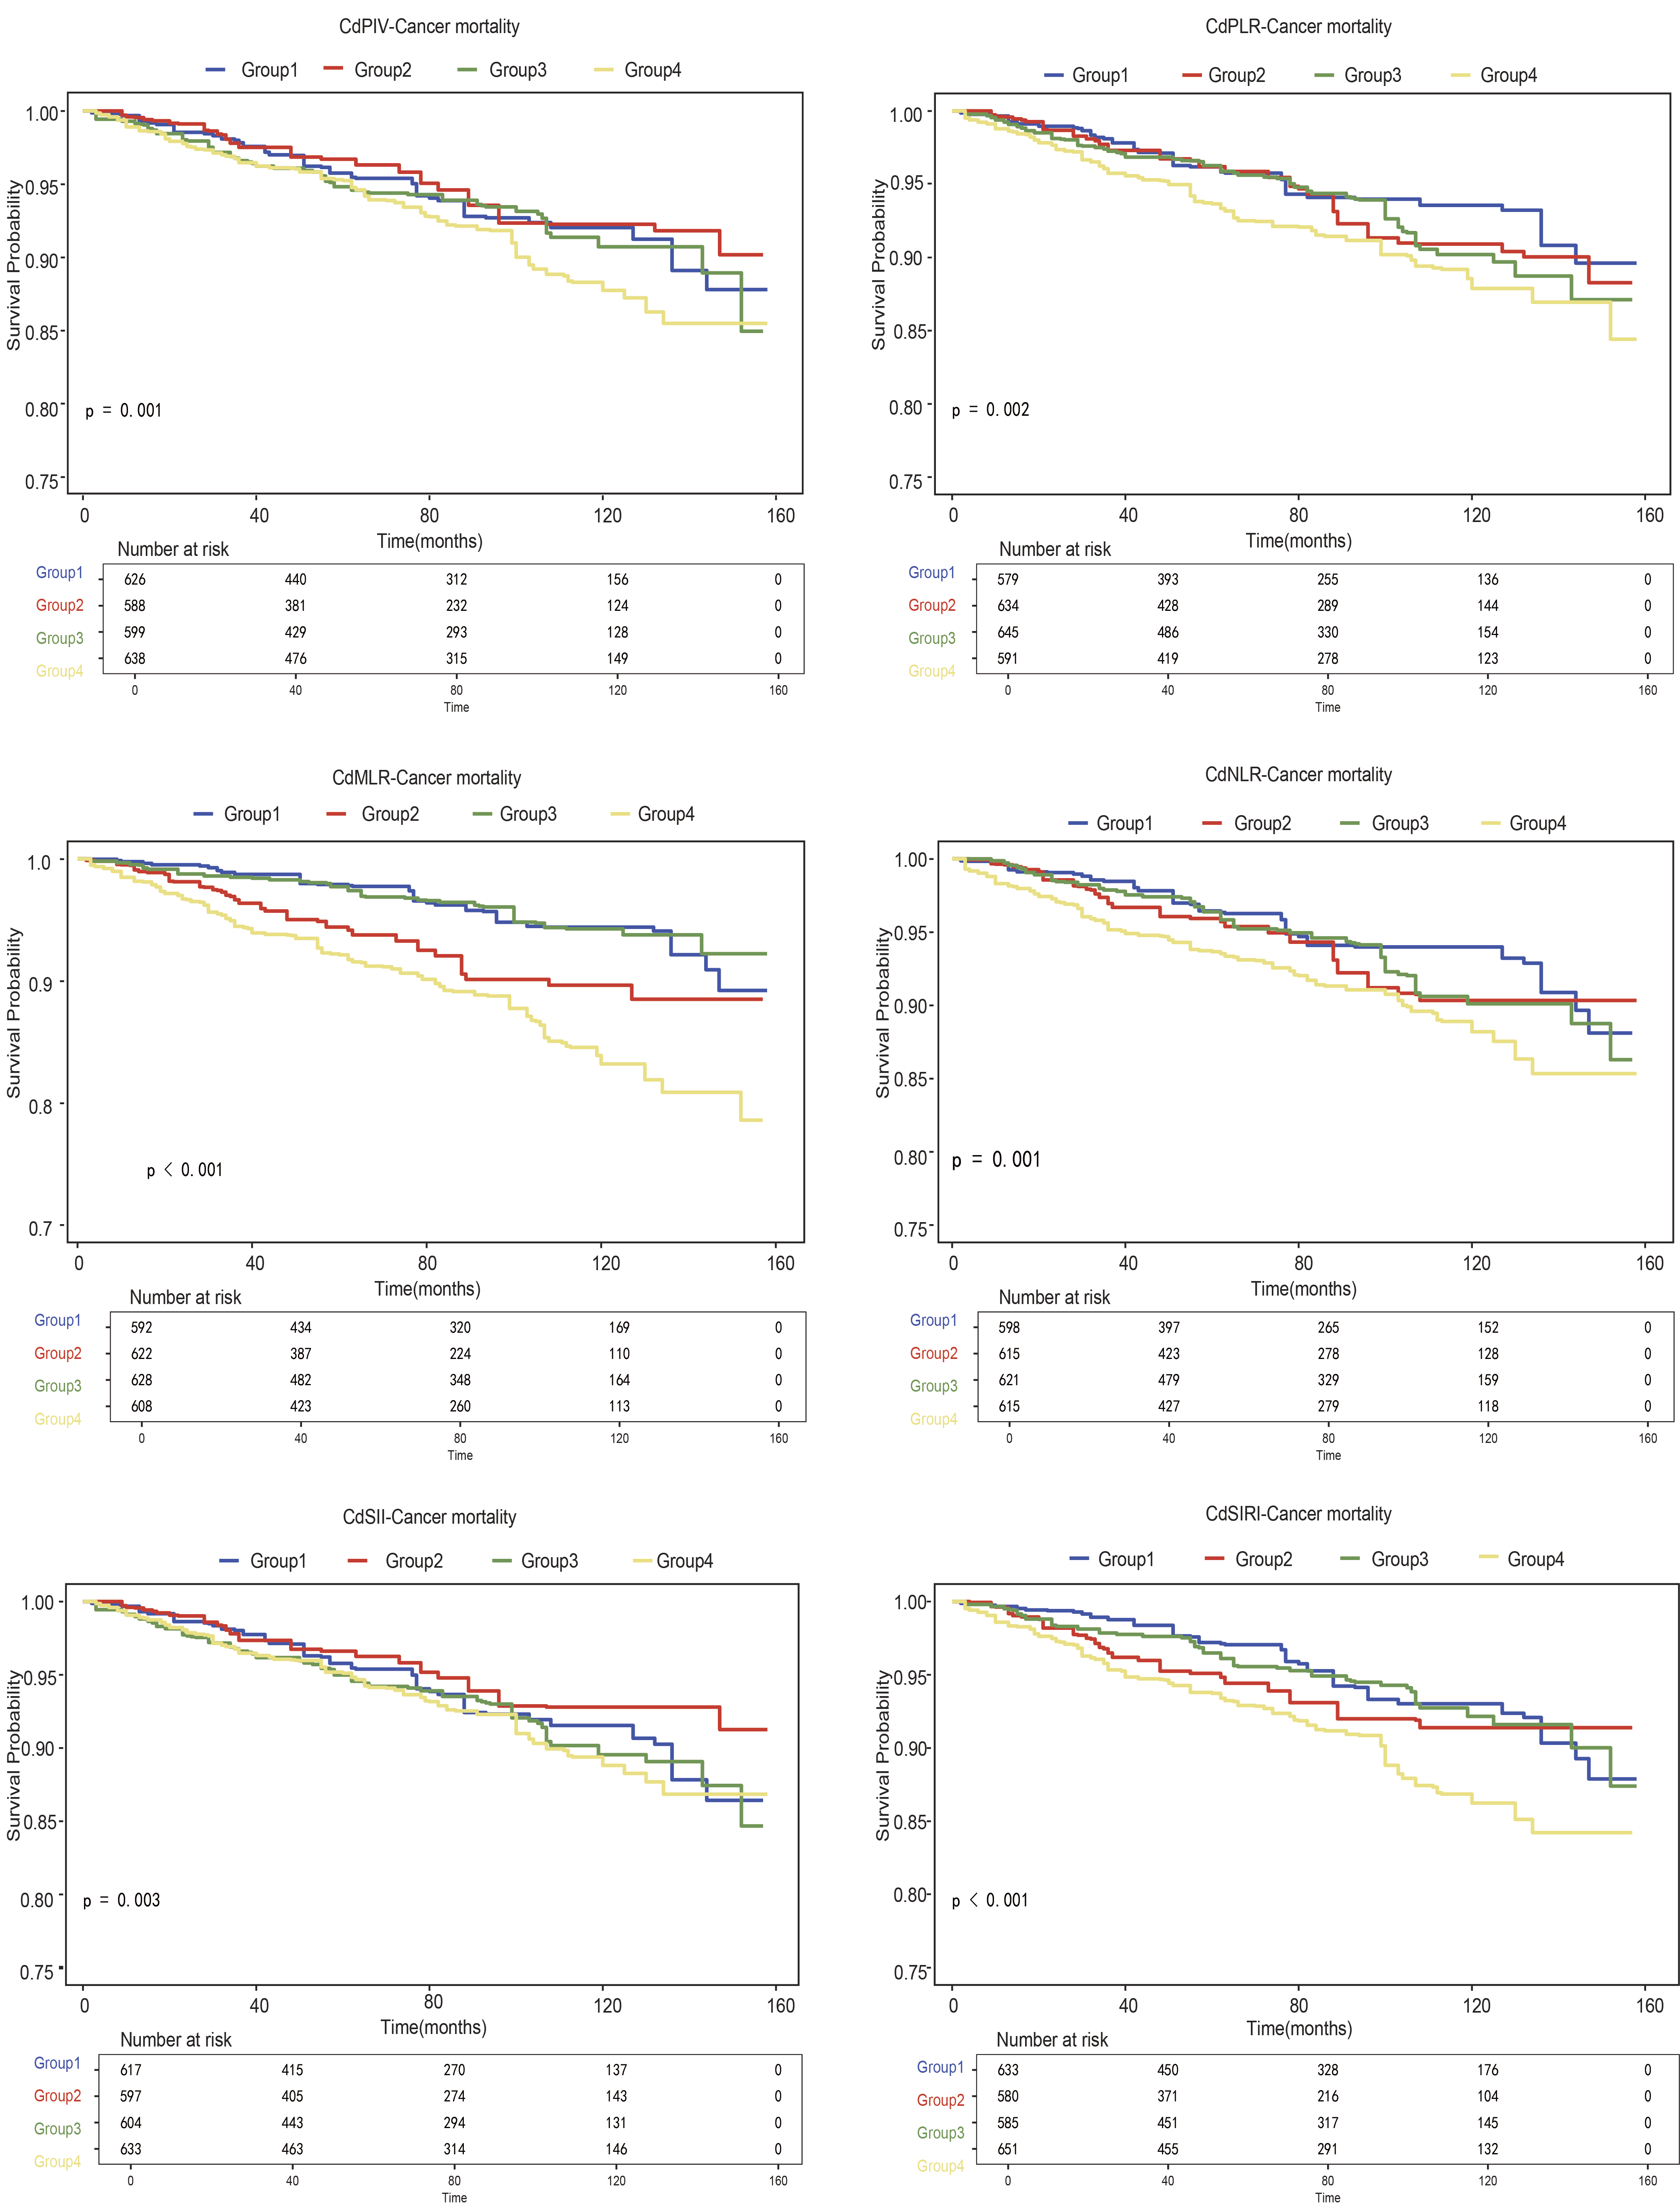


Group 1 refers to Low blood cadmium levels & CBC-derived inflammatory biomarkers  ≤  median; Group 2 refers to Low blood cadmium levels & CBC-derived inflammatory biomarkers  ≥  median; Group 3 refers to High blood cadmium levels & CBC-derived inflammatory biomarkers  ≤ median; Group 4 refers to High blood cadmium levels & CBC-derived inflammatory biomarkers  ≥  median.

PIV:platelet-immune inflammation value; NLR:neutrophil-to-lymphocyte ratio; MLR:monocyte-to-lymphocyte ratio;PLR:platelet-to-lymphocyte ratio;SII:systemic immune-inflammation index;SIRI:systemic inflammation response index;Cd:blood cadmium.

**Figure S2 Weighted K-M curve of CVD** **mortality in cancer survivors based on blood cadmium levels combined with inflammatory indicators.**


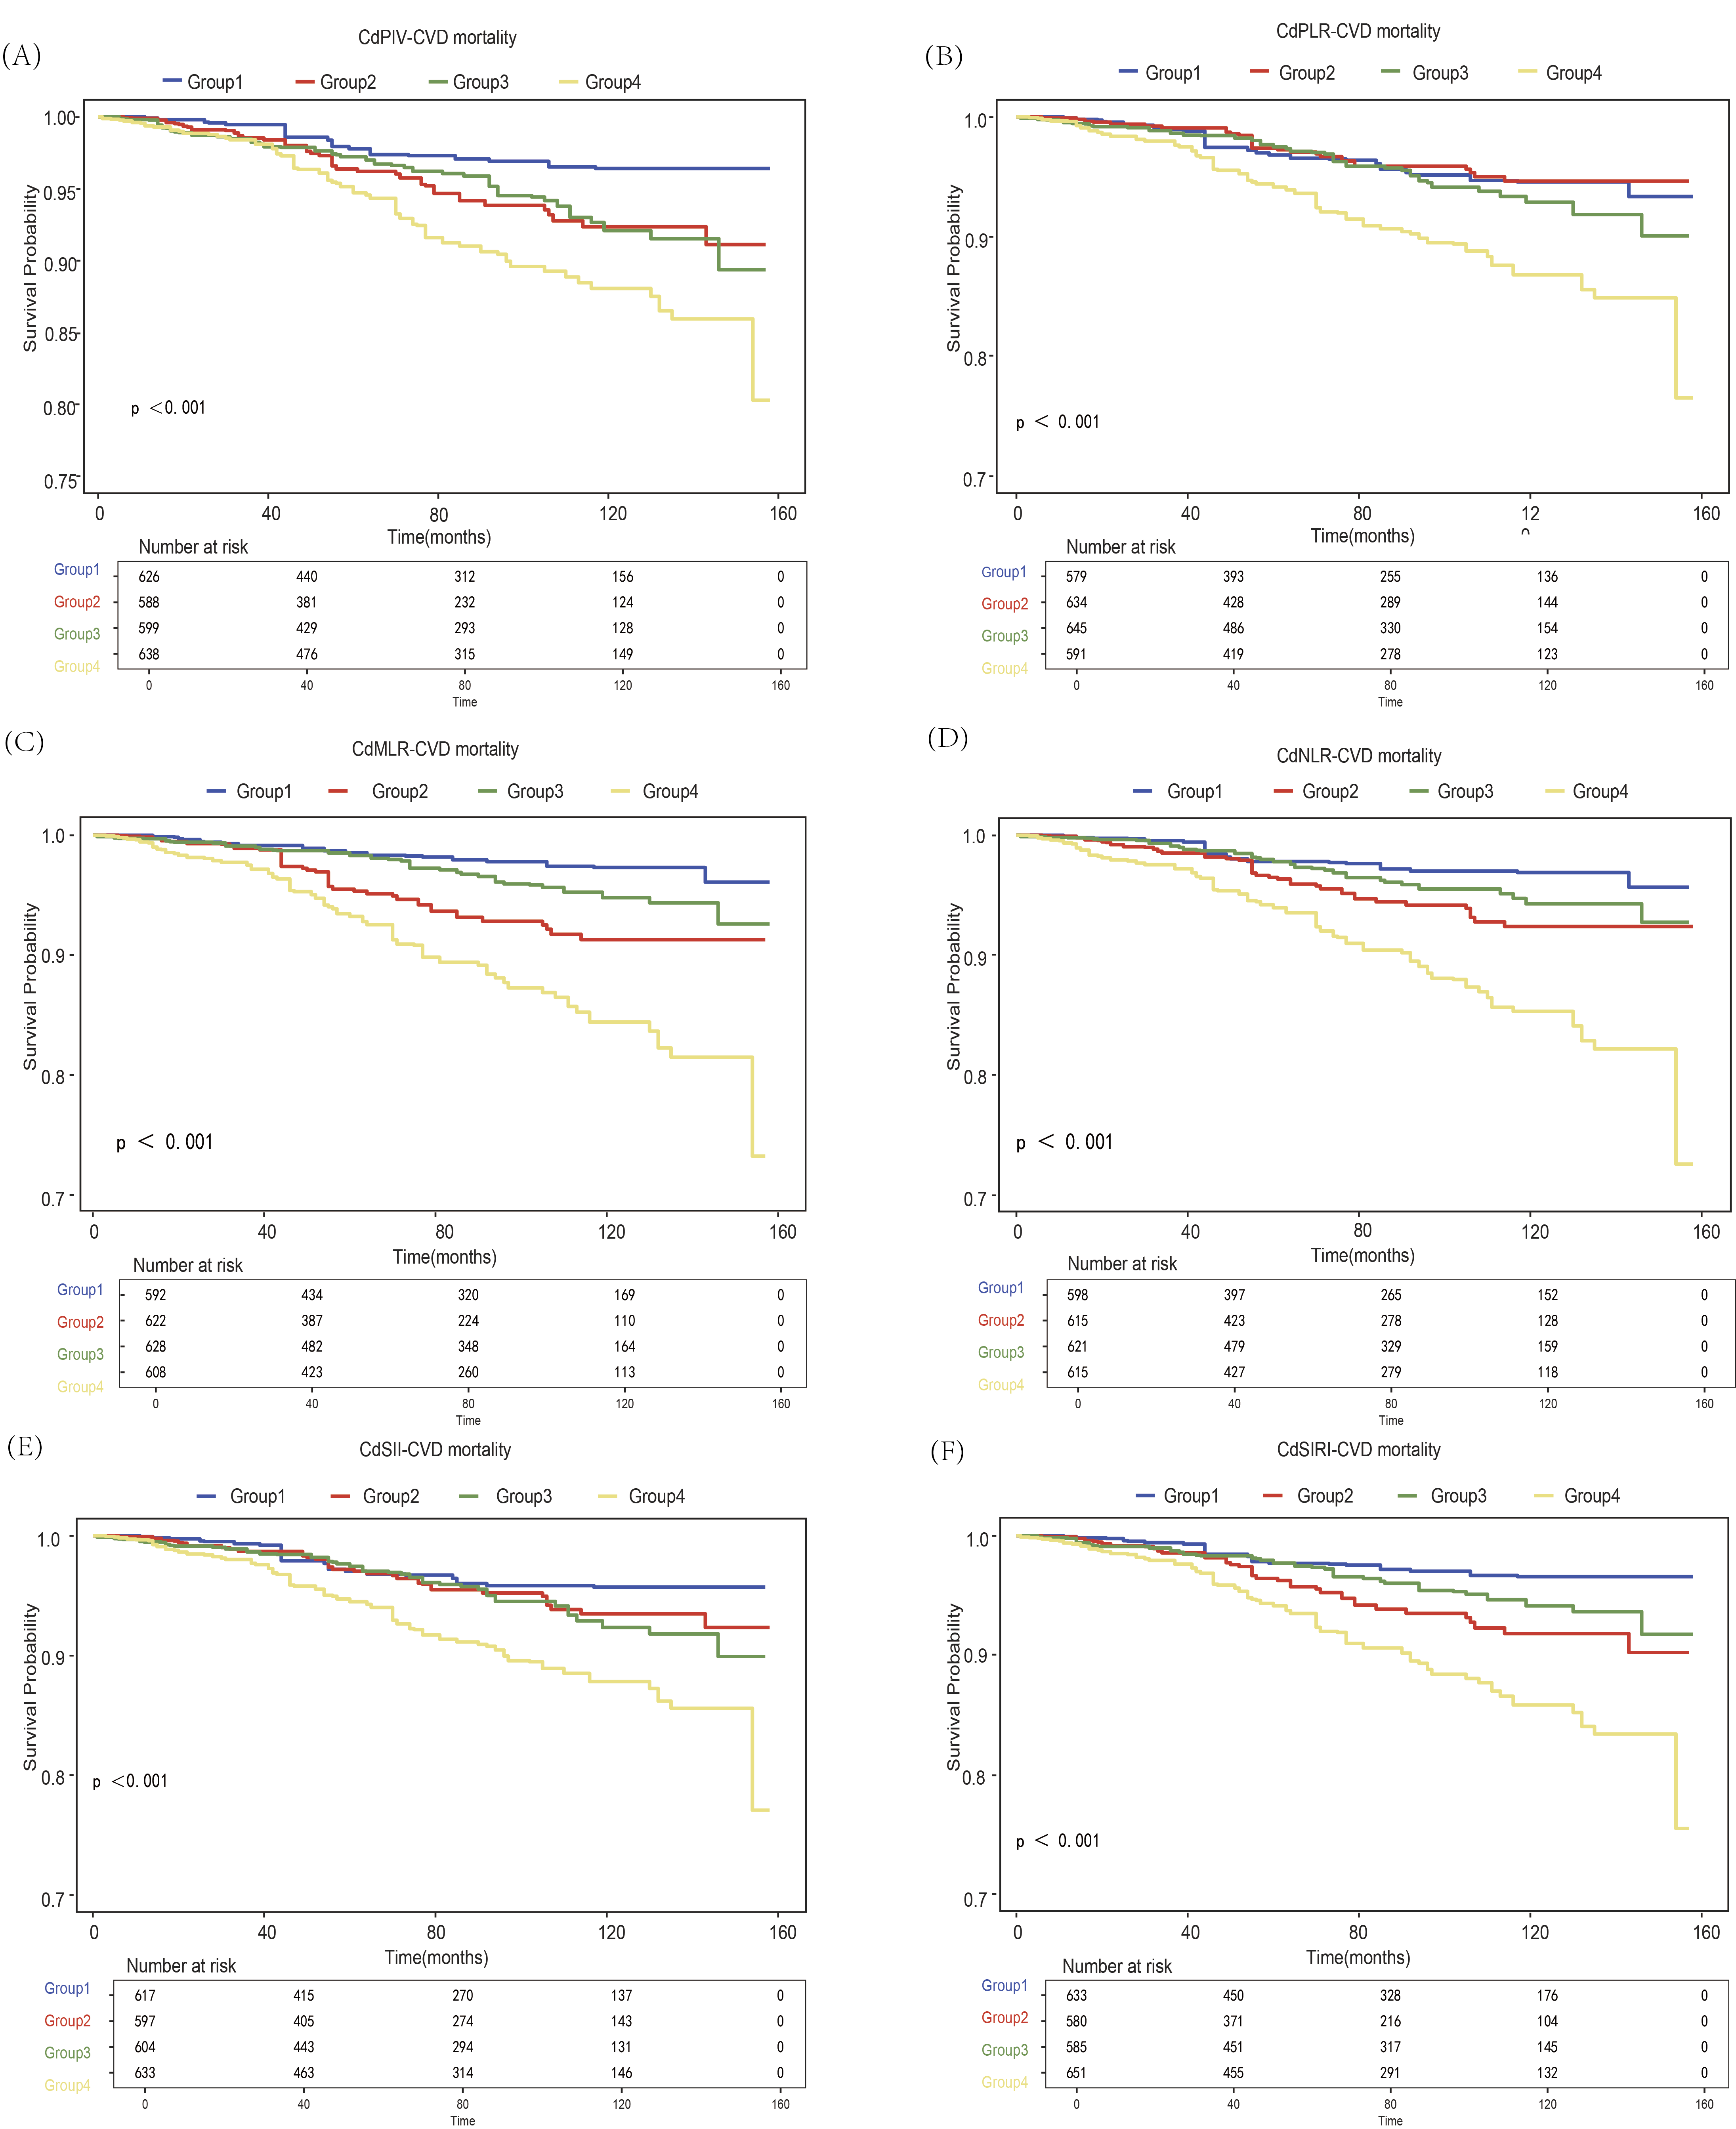


Group 1 refers to Low blood cadmium levels & CBC-derived inflammatory biomarkers  ≤  median; Group 2 refers to Low blood cadmium levels & CBC-derived inflammatory biomarkers  ≥  median; Group 3 refers to High blood cadmium levels & CBC-derived inflammatory biomarkers  ≤ median; Group 4 refers to High blood cadmium levels & CBC-derived inflammatory biomarkers  ≥  median.

PIV:platelet-immune inflammation value; NLR:neutrophil-to-lymphocyte ratio; MLR:monocyte-to-lymphocyte ratio;PLR:platelet-to-lymphocyte ratio;SII:systemic immune-inflammation index;SIRI:systemic inflammation response index;Cd:blood cadmium.


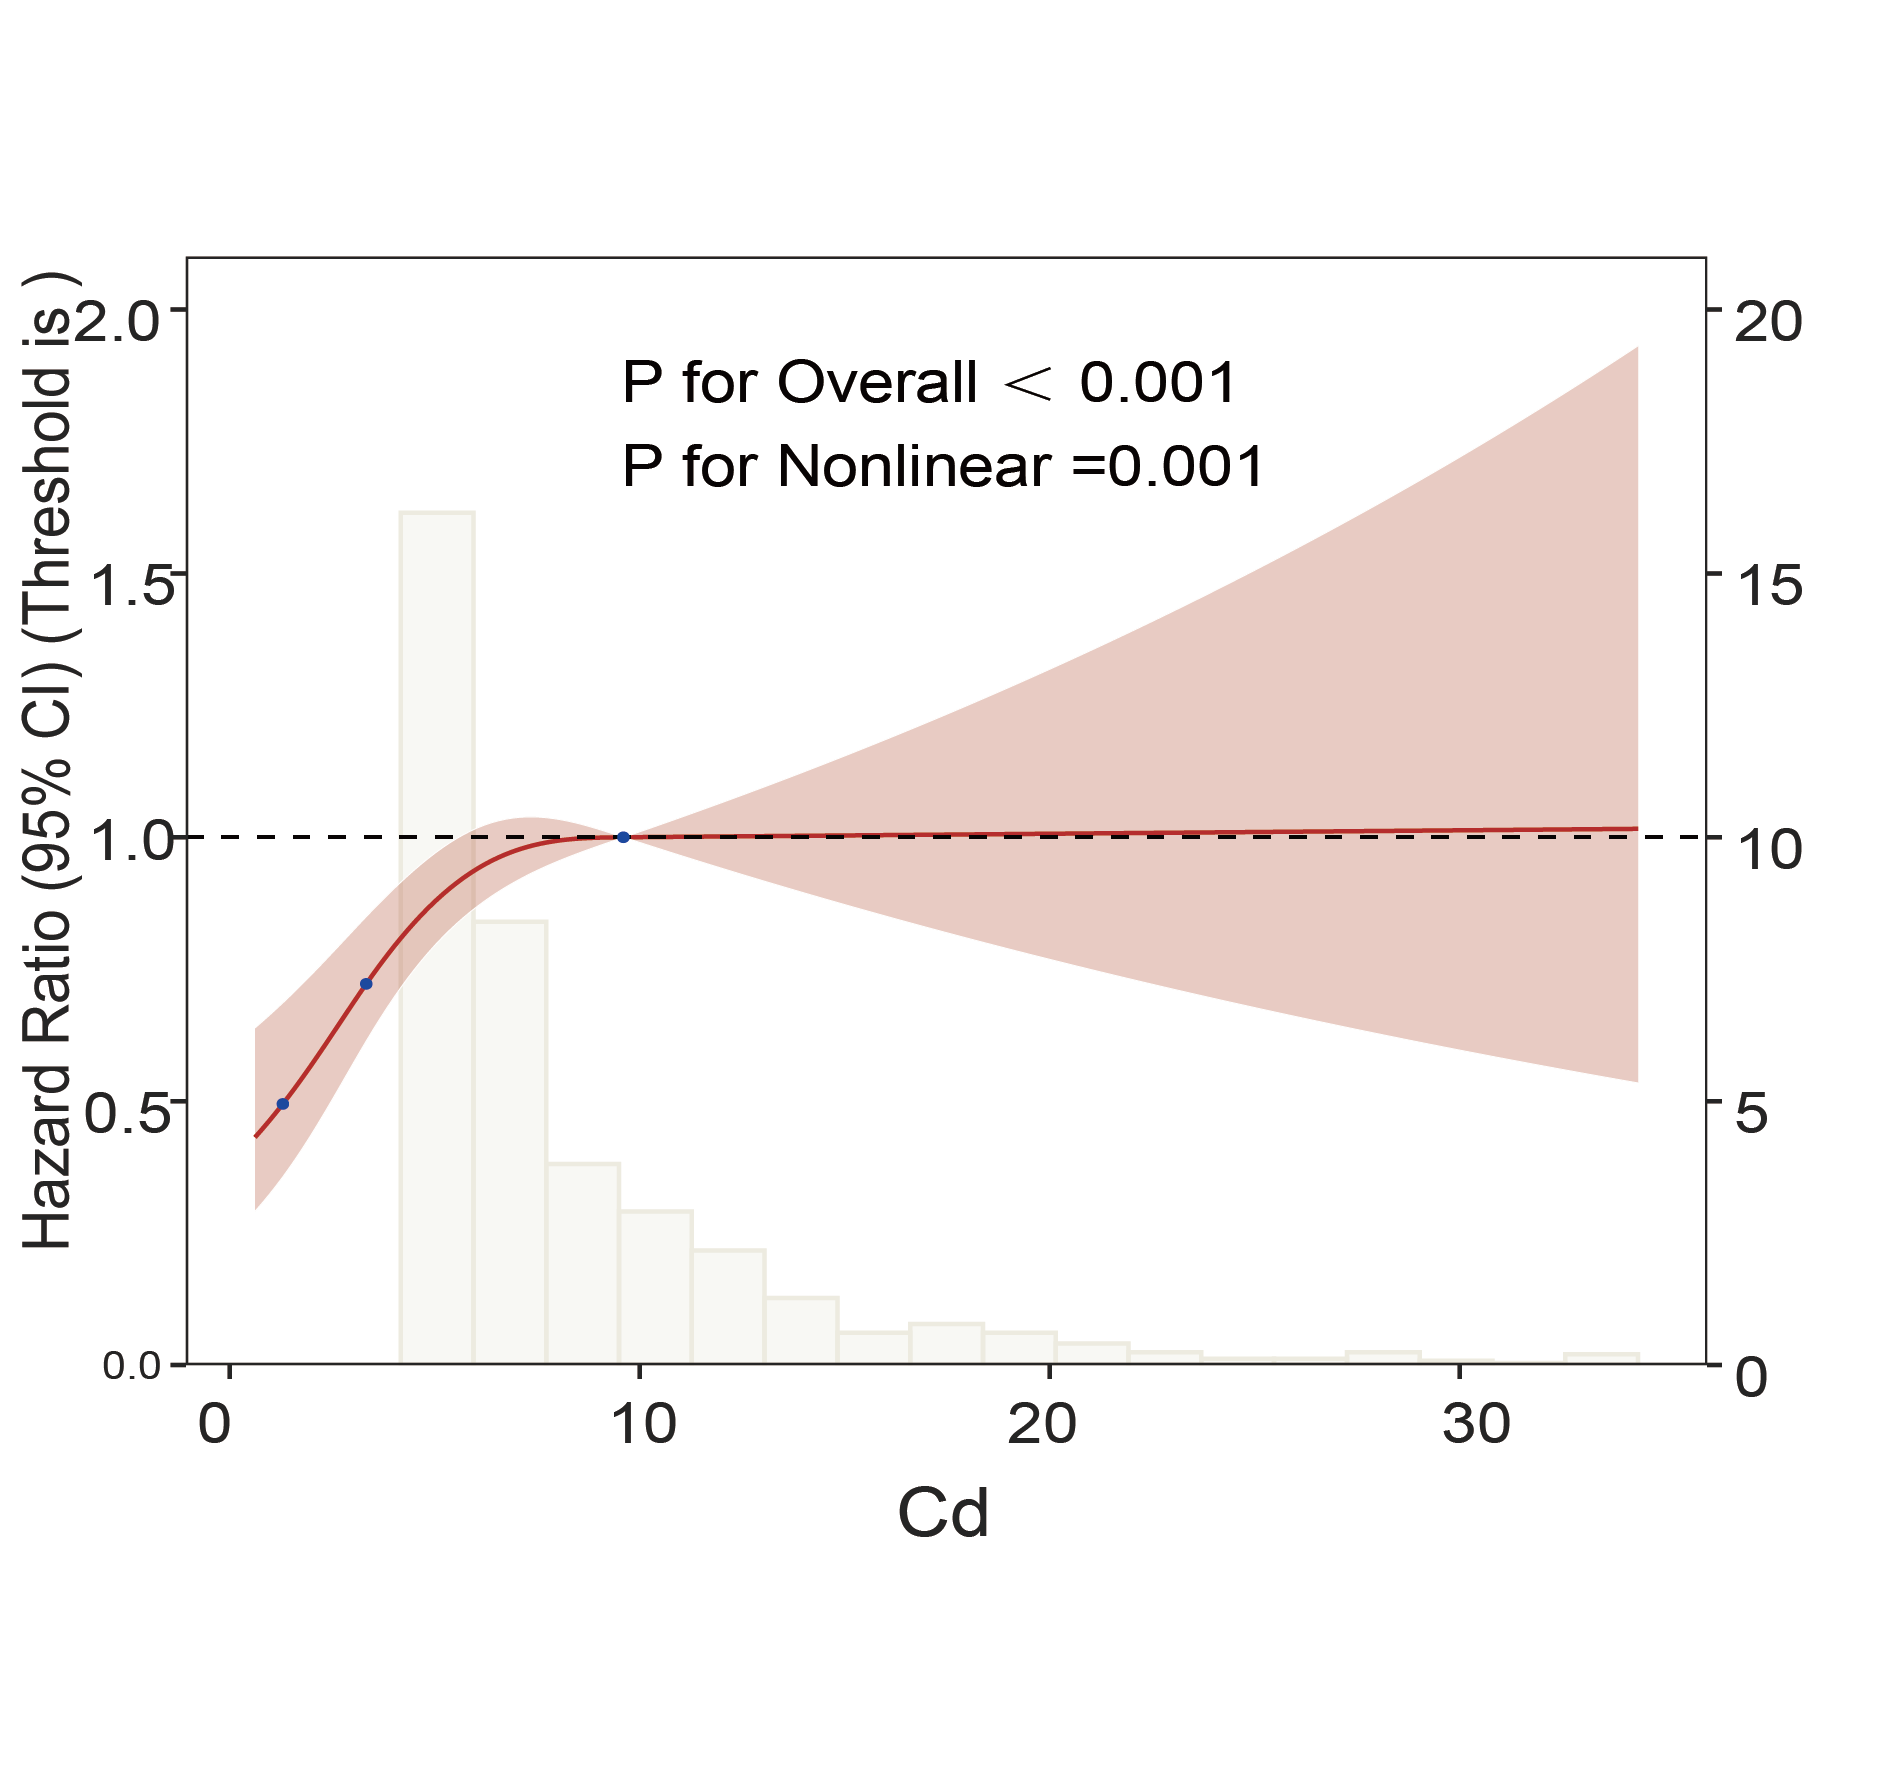


**Figure S3 The independent blood cadmium levels on the all-cause mortality of cancer survivors**

The spline analysis was adjusted based on factors such as age, gender, education level, poverty level, marital status, BMI, smoking status, drinking status, sleep disorder status, hypertension, and diabetes.

Cd:blood cadmium.
